# Supplementary material for: Physiological and Biochemical Response to Fusarium culmorum Infection in Three Durum Wheat Genotypes at Seedling and Full Anthesis Stage
Source: MDPI journal article supplement (doi:10.3390/ijms22147433), 2021-07-11
Supplement: s1 [file s1]

**Table S1. Multiple reactions monitoring (MRM) transitions for the analyzed mycotoxins at positive ion mode (+ESI), capillary voltage 4 kV, gas temperature 300 °C, gas flow 12 l/min and nebulizer pressure 35 psi. MassHunter software was used to control the UHPLC–MS/MS system and in data analysis. For MRM parameters optimization MassHunter Optimizer was used.**

|                                                    |           | Type of ion        | Precursor ion | Quantifier product ion | Qualifier product Ion | Fragmentor voltage (V) | Collision energy (V) | Retention Time (min) |
|----------------------------------------------------|-----------|--------------------|---------------|------------------------|-----------------------|------------------------|----------------------|----------------------|
| Nivalenol                                          | NIV       | [M+H] <sup>+</sup> | 295.2         | 137                    | 91.1                  | 102                    | 13; 49               | 1.05                 |
| Deoxynivalenol                                     | DON       | [M+H] <sup>+</sup> | 297.2         | 249.1                  | 77.1                  | 79                     | 9; 69                | 1.8                  |
| 3-acetyldeoxynivalenol and 15-acetyldeoxynivalenol | 3+15AcDON | [M+H] <sup>+</sup> | 339.2         | 261.1                  | 203.1                 | 84                     | 9; 13                | 3.2                  |
| Alpha-zearalanol                                   | aZAL      | [M+H] <sup>+</sup> | 305.2         | 189.1                  | 123                   | 145                    | 13; 29               | 5.1                  |
| Beta- zearalanol                                   | bZAL      | [M+H] <sup>+</sup> | 305.2         | 189.1                  | 123                   | 145                    | 13; 29               | 4.6                  |
| Alpha zearalenol                                   | aZEL      | [M+H] <sup>+</sup> | 303.2         | 285.1                  | 91.1                  | 114                    | 9; 61                | 5.3                  |
| Beta-zearalenol                                    | bZEL      | [M+H] <sup>+</sup> | 303.2         | 285.1                  | 91.1                  | 114                    | 9; 61                | 4.8                  |
| T2- toxin                                          | T2        | [M+H] <sup>+</sup> | 484.2         | 215.2                  | 185.1                 | 114                    | 13; 21               | 5.4                  |
| Zearalenone                                        | ZEN       | [M+H] <sup>+</sup> | 319.2         | 301.1                  | 283.1                 | 107                    | 9; 9                 | 5.75                 |
